# Supplementary material for: Purple acid phosphatase 10c encodes a major acid phosphatase that regulates plant growth under phosphate-deficient conditions in rice
Source: PubMed Central journal article supplement (PMC7475256; doi:10.1093/jxb/eraa179), 2020-04-09
Supplement: eraa179_suppl_supplementary_figures.pdf [file eraa179_suppl_supplementary_figures.pdf]

Figure S1

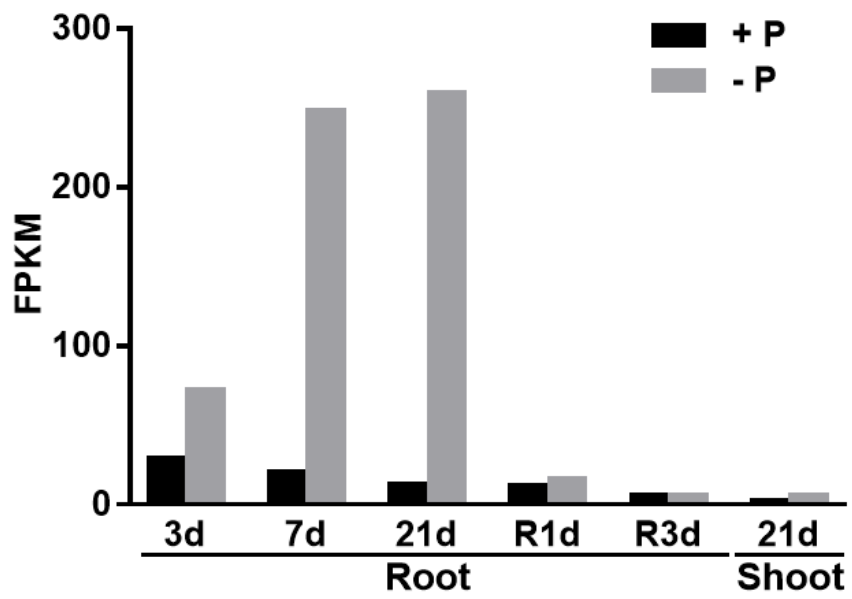

Figure S1. The expression of *OsPAP10c* in roots and shoot under Pi sufficient and deficient conditions.

**Figure S2**

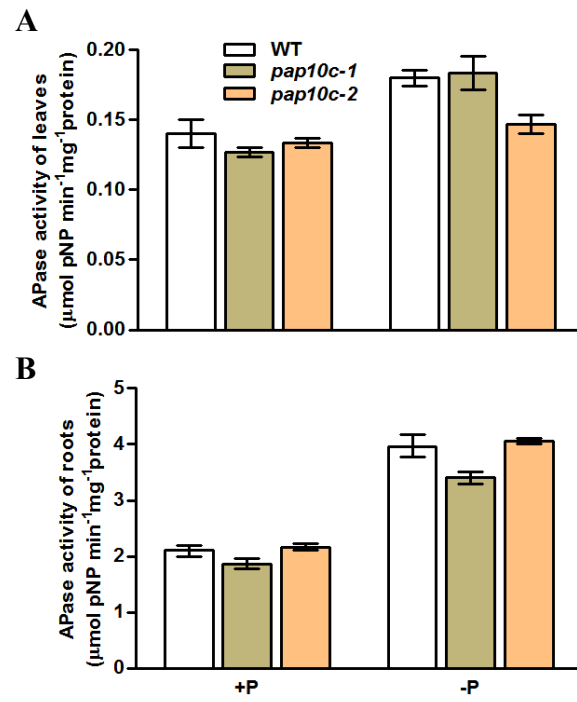

**Figure S2.** Acid phosphatase activities in leaves and roots of wild type (WT) and *pap10c* mutants.

**Figure S3**

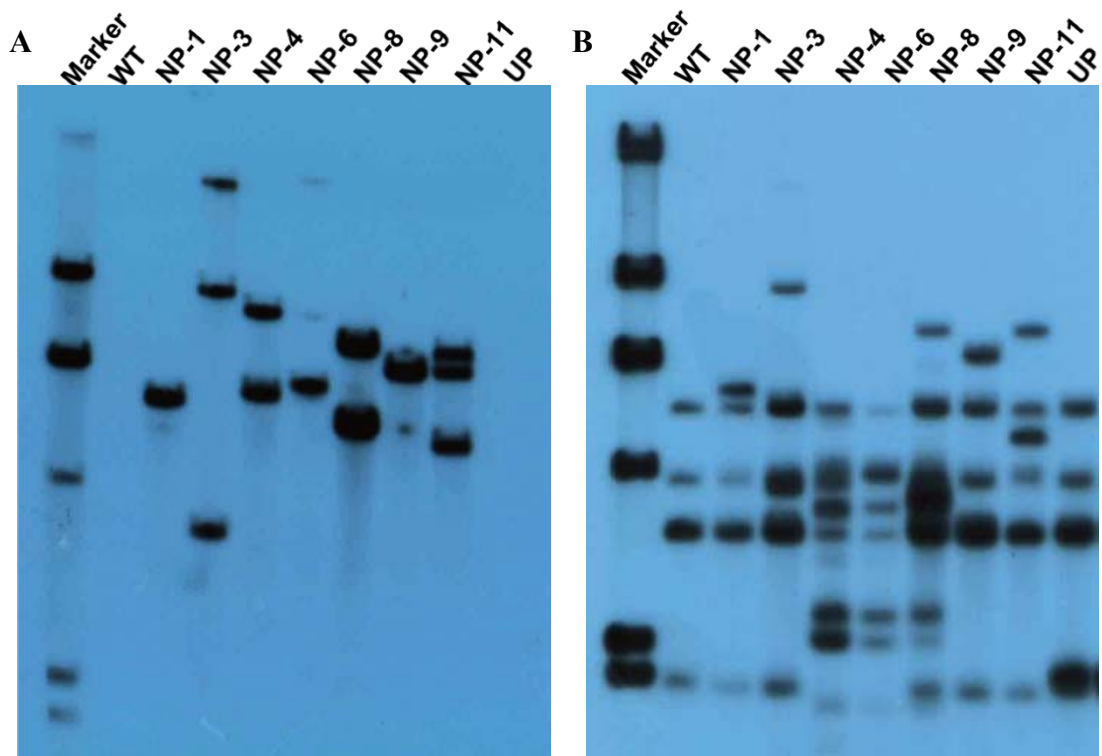

**Figure S3.** Southern blot analysis of WT and transgenic plants.

**Figure 4**

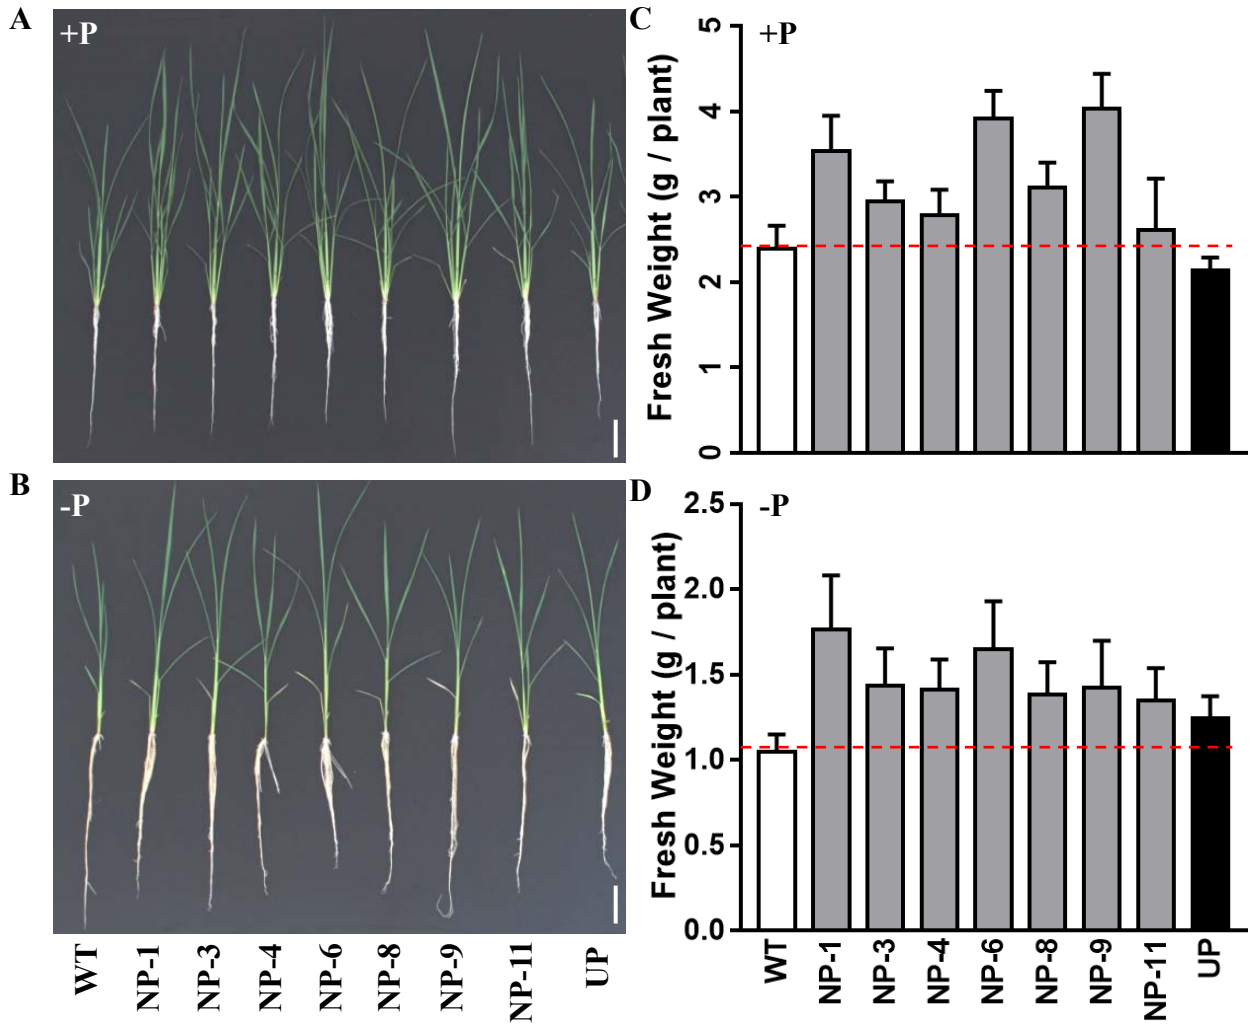

**Figure S4.** Phenotype of WT and transgenic plants under Pi sufficient and deficient conditions.

**Figure S5**

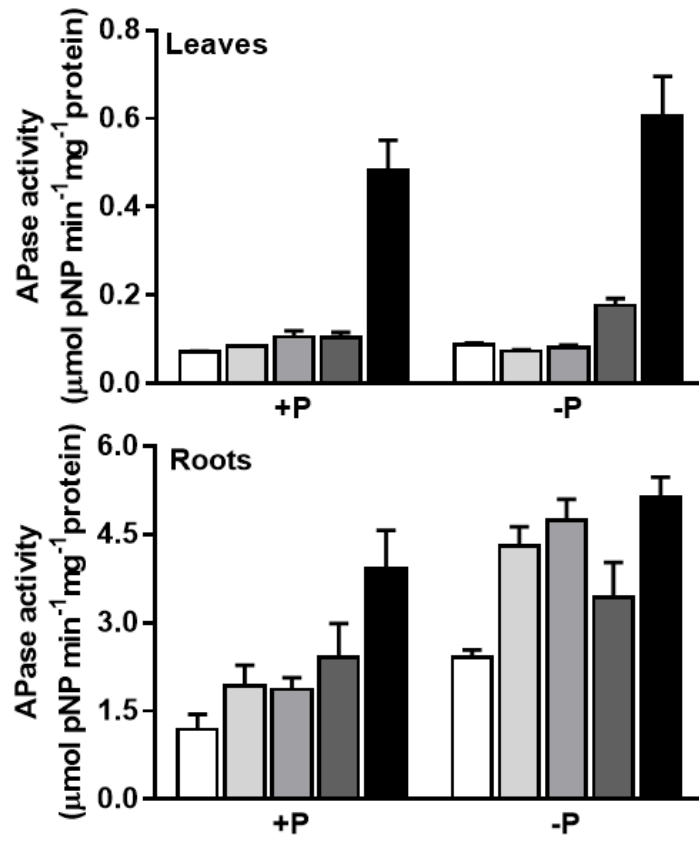

**Figure S5.** Acid phosphatase activities in leaves and roots of WT and transgenic plants under Pi sufficient and deficient conditions.

**Figure S6**

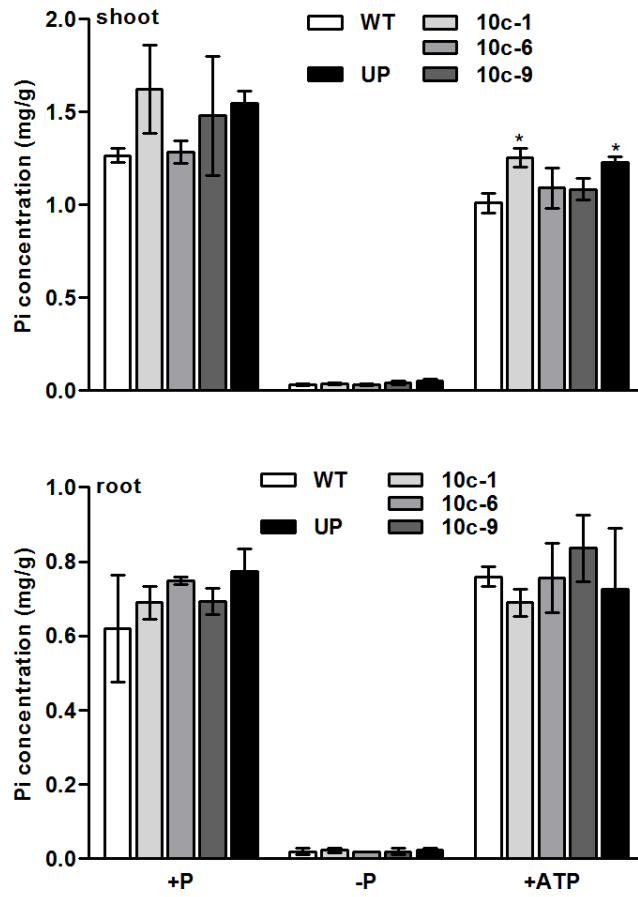

**Figure S6.** Pi concentration of WT and transgenic plants under Pi sufficient, deficient and ATP supply conditions.

**Figure S7**

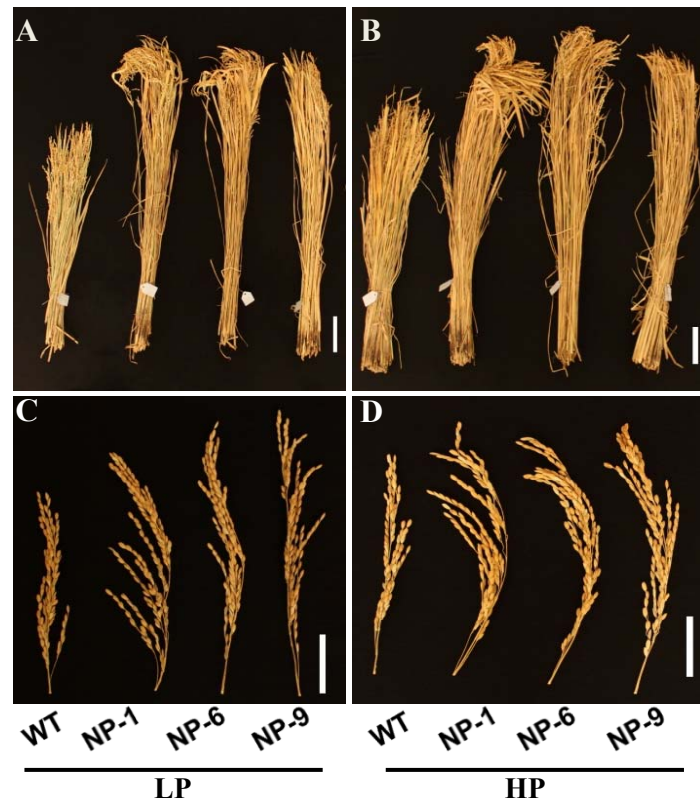

**Figure S7.** Growth performance and panicle size of WT and transgenic plants grown in the field, Bar = 10 cm.

**Figure S8**

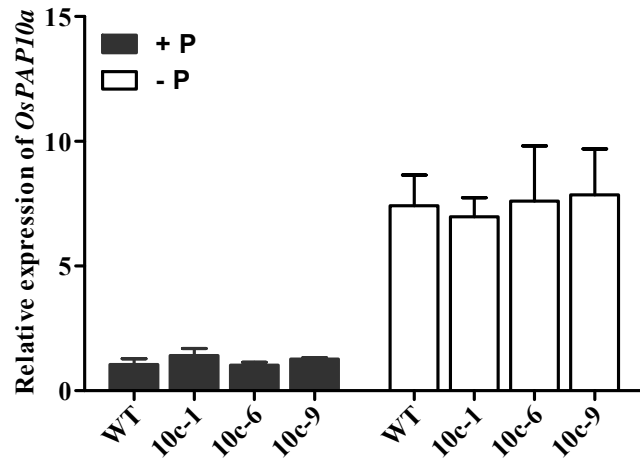

**Figure S8.** The expression of *OsPAP10a* in WT and *OsPAP10c* NP transgenic plants under Pi sufficient (+P) and deficient (-P) conditions.
